# Supplementary material for: Amino-functionalized green fluorescent carbon dots as surface energy transfer biosensors for hyaluronidase
Source: Royal Society of Chemistry journal article supplement (doi:10.1039/c5nr00070j), 2015-01-01
Supplement: c5nr00070j1.pdf [file c5nr00070j1.pdf]

## Electronic Supplementary Information

### Amino-functionalized Green Fluorescent Carbon Dots as Surface Energy Transfer Biosensors for Hyaluronidase

Siyu Liu<sup>a</sup>, Ning Zhao<sup>a</sup>, Zhen Cheng<sup>\*b</sup> and Hongguang Liu<sup>\*a</sup>

<sup>a</sup> Institute of Molecular Medicine, College of life and health sciences, Northeastern University, Shenyang 110000, China

<sup>b</sup> Molecular Imaging Program at Stanford, Stanford University, Palo Alto, CA 94301, USA

\*Correspondence author: email: [simonliu@mail.neu.edu.cn](mailto:simonliu@mail.neu.edu.cn) or [zcheng@stanford.edu](mailto:zcheng@stanford.edu)

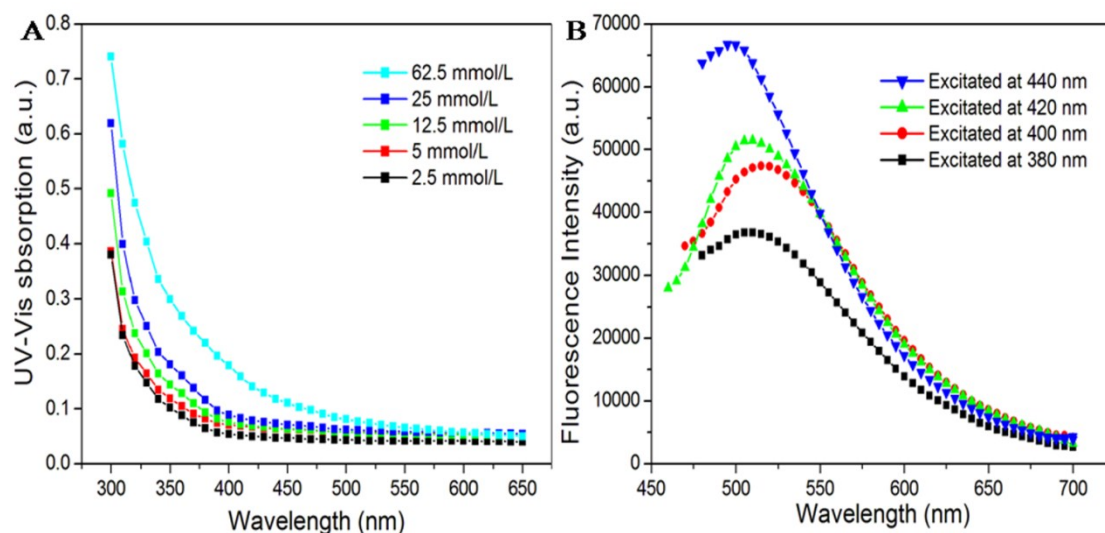

**Fig. S1** (A) UV-Vis absorption spectra of CDs synthesized by different concentration of sodium pyrophosphate increasing from 2.5 to 62.5 mmol/L (2.5, 5, 12.5, 25, 62.5 mmol/L). (B) The fluorescence emission spectra of CDs with different fluorescence excitation wavelengths.

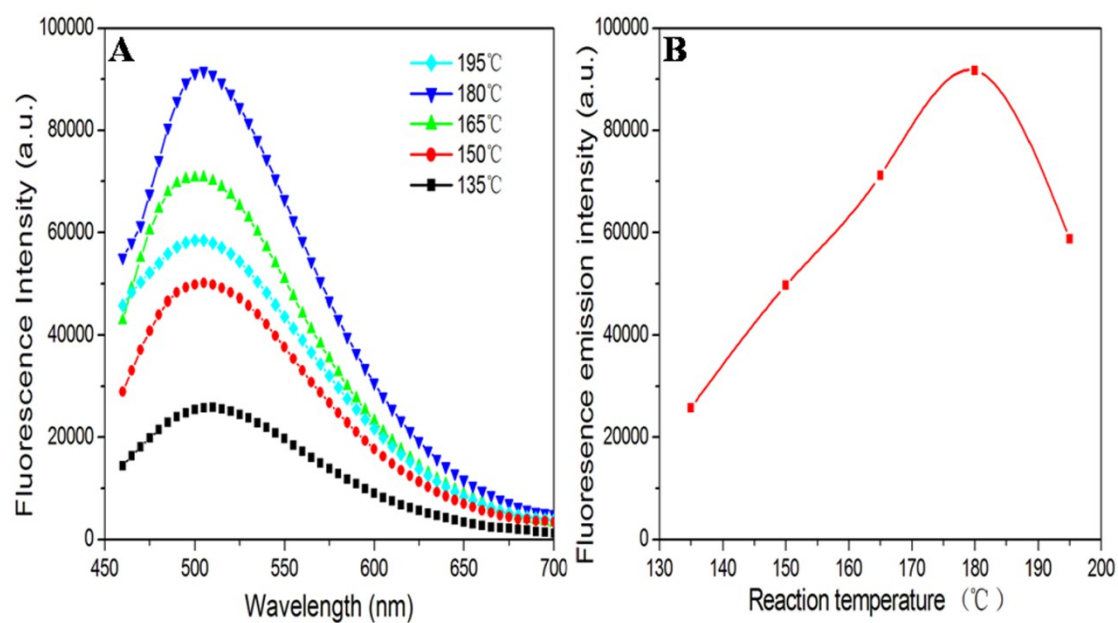

**Fig. S2** (A) Fluorescence emission spectra and (B) fluorescence emission intensity at maximum of CDs synthesized at various temperature. (Sodium pyrophosphate concentration was 62.5 mmol/L )

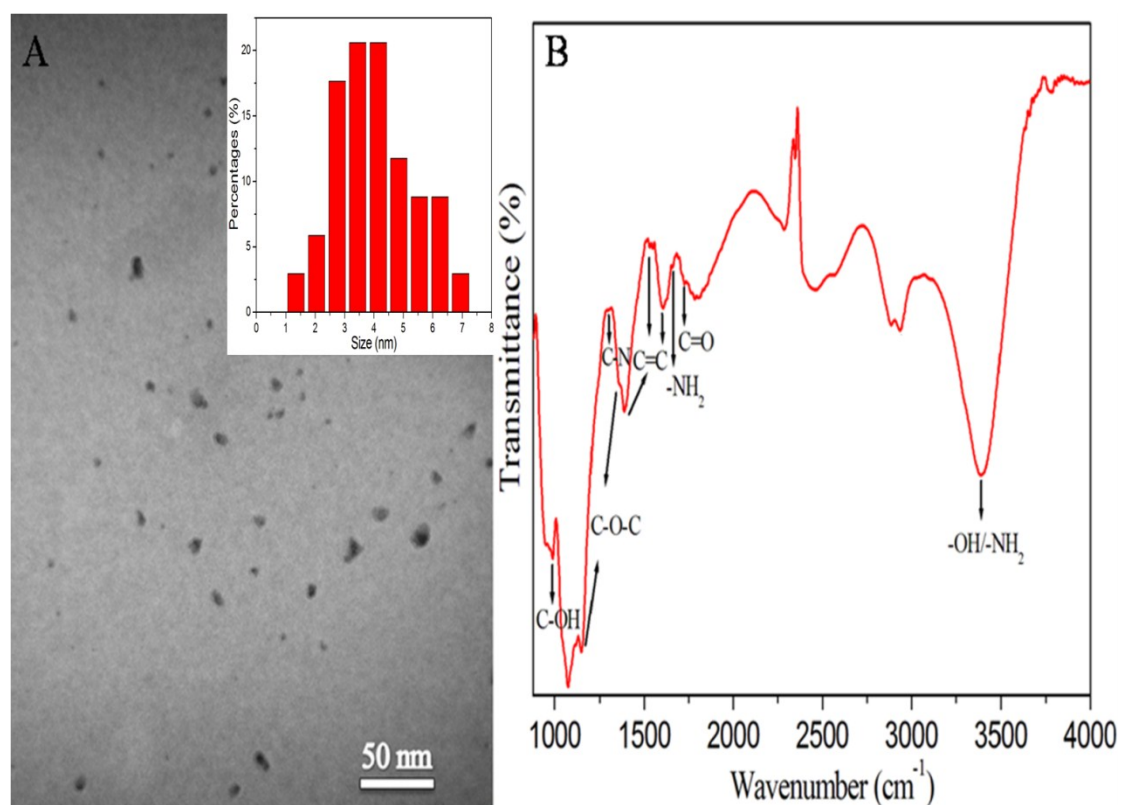

**Fig.S3** (A) The TEM image and (B) FT-IR spectra of as-prepared CDs

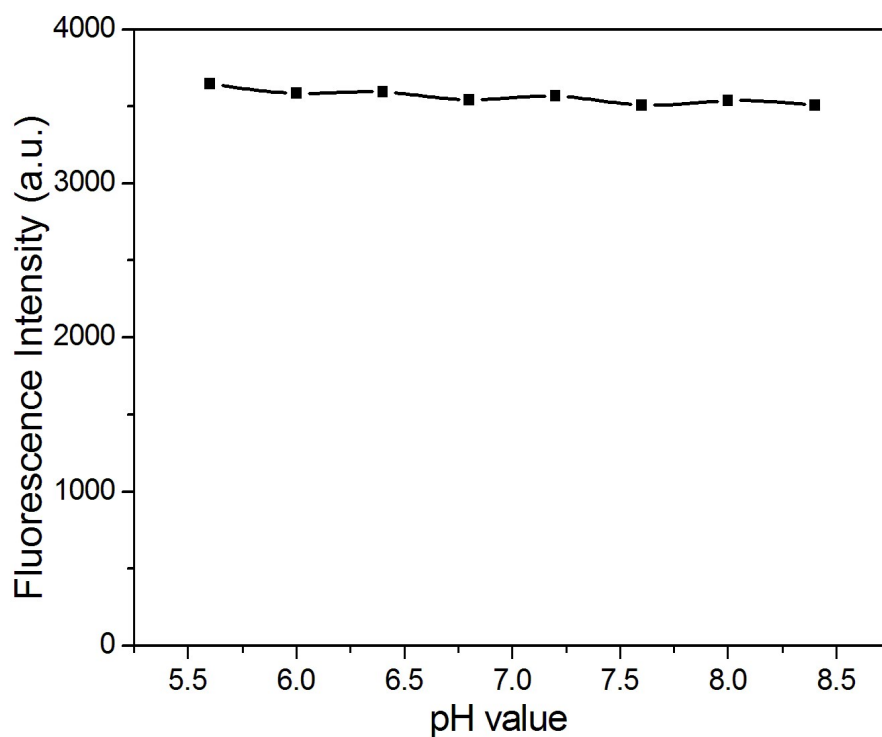

**Fig. S4** The fluorescence intensity of the synthesized CDs solution measured in different pH environments.

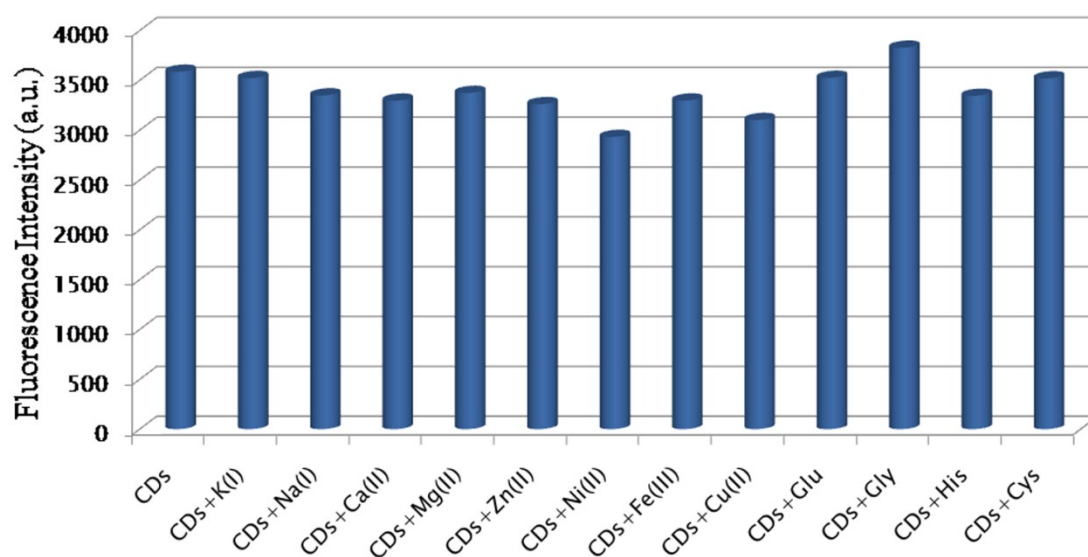

**Fig.S5** The fluorescence intensity of CDs solution and CDs solution with individual metal ions and molecules. (5 mmol/L  $K^+$ ,  $Na^+$ ,  $Ca^{2+}$ ,  $Mg^{2+}$ , Glu, Gly, His and Cys, 2.5 mmol/L  $Zn^{2+}$  and  $Ni^{2+}$ , and 0.2 mmol/L  $Fe^{3+}$  and  $Cu^{2+}$  )

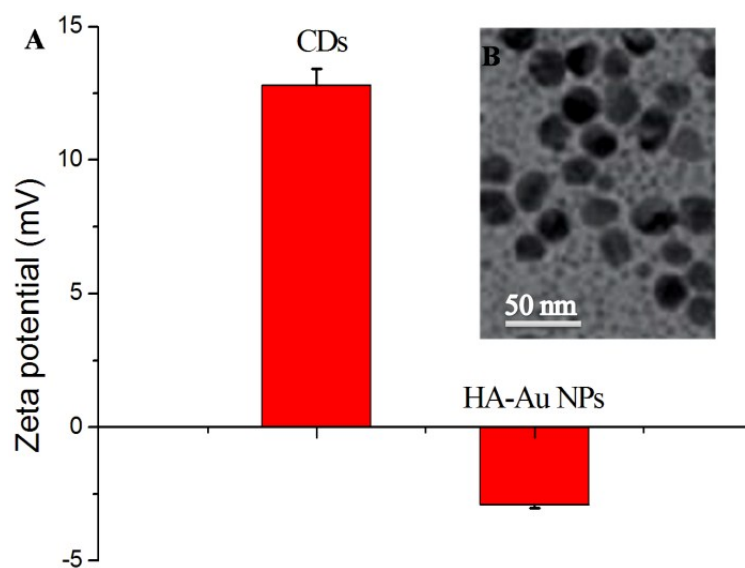

**Fig.S6** (A) Zeta potentials measurements of amino-functionalized CDs and HA-AuNPs in pH 6.0 solution. (B) TEM image of amino-functionalized CDs and HA-Au NPs mixture solution.

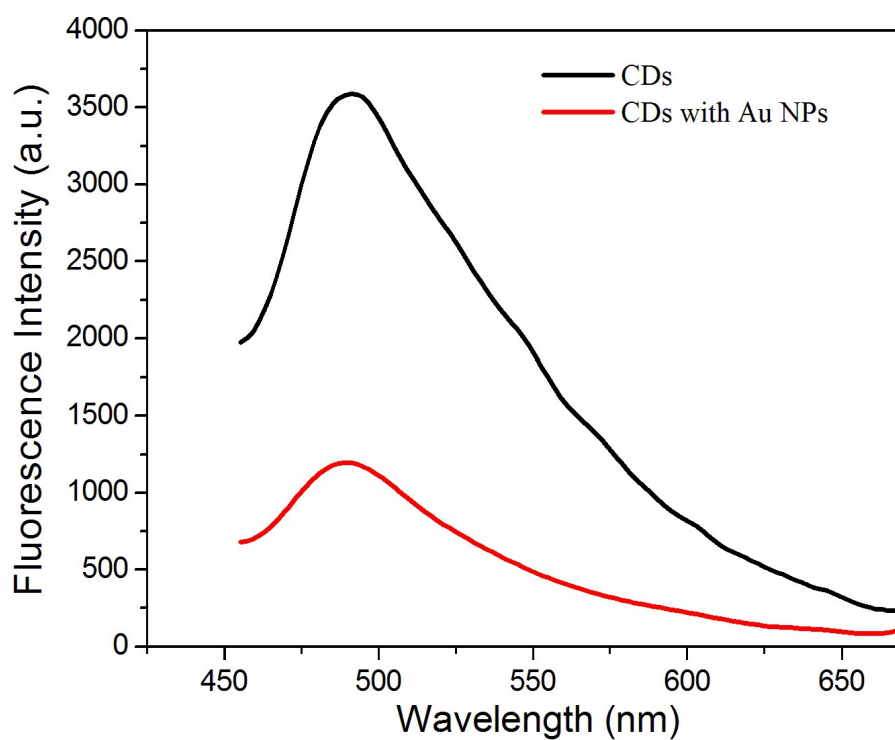

**Fig.S7** The fluorescence emission spectra of prepared CDs solution with and without HA-Au NPs. (10 mmol/L  $\text{NaH}_2\text{PO}_4$ - $\text{Na}_2\text{HPO}_4$  buffer solution, pH 6.0)

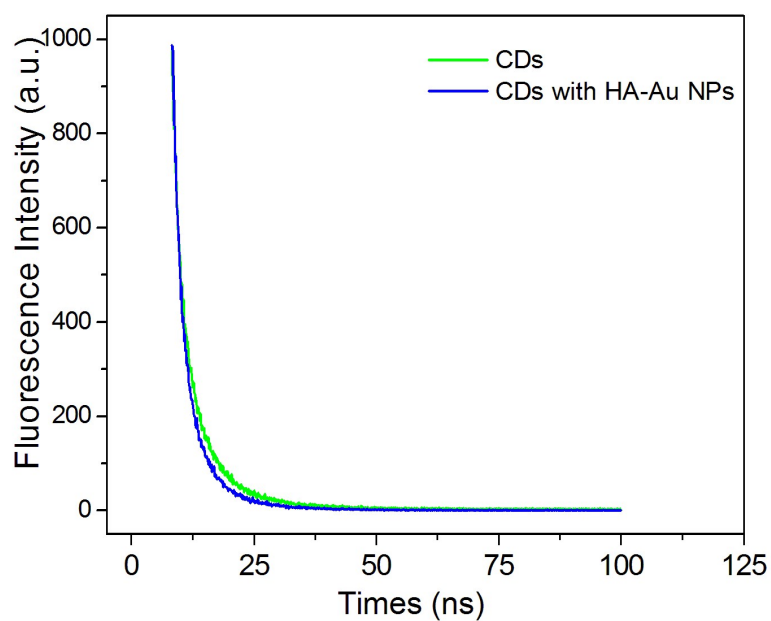

**Fig.S8.** The fluorescence life time determination of amino-functionalized CDs (Green line) and the SET system composed of amino-functionalized CDs and HA-Au NPs (Blue line).

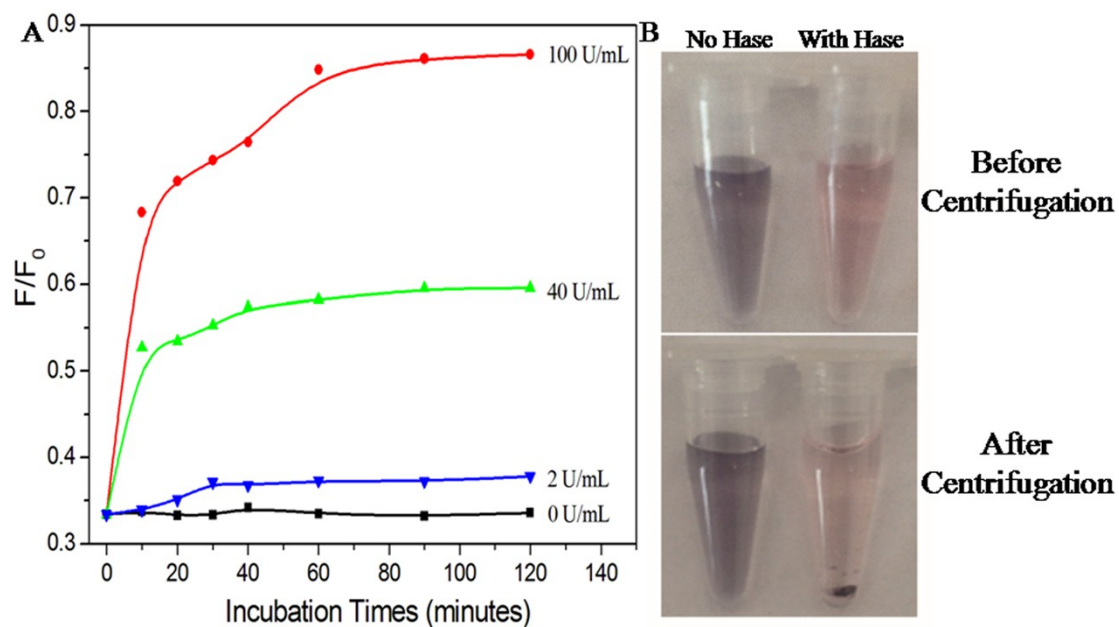

**Fig.S9** (A) The fluorescence intensity ratios changes of CDs/HA-Au NPs system as a function of the Hase enzyme digestion time. The Hase concentration is respectively 0, 2, 40, 100 U/mL.

Reaction condition: 10 mmol/ L  $\text{NaH}_2\text{PO}_4\text{-Na}_2\text{HPO}_4$  buffer solution (pH 6.0) at 37°C.  $F_0$  is the original fluorescence intensity of CDs, and  $F$  is the fluorescence intensity of CDs/HA-Au NPs system with the addition of various concentration of Hase. (B) The picture shows the color change of the CDs/HA-Au NPs solutions incubated with 100 U/mL Hase before or after centrifugation.

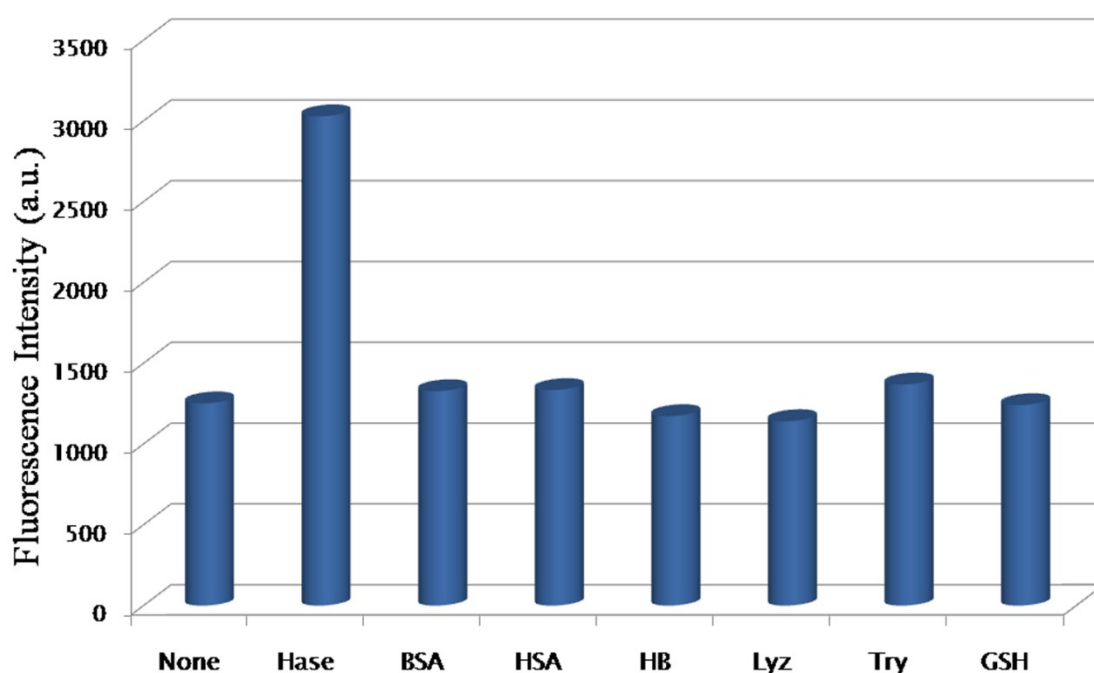

**Fig.S10** The fluorescence intensity of the CDs/HA-Au NPs assay system and respectively incubated with 0.25 mg/mL (100 U/mL) Hase, BSA, HSA, HB, Lyz, Try or GSH for 2 hours. Reaction condition: 10 mmol/ L  $\text{NaH}_2\text{PO}_4\text{-Na}_2\text{HPO}_4$  buffer solution (pH 6.0) at 37°C.

**Table S1** Determination of Hase in fetal bovine serum samples according to equation (1)

| Serum samples | Added Hase<br>(U/mL) | Detected Hase<br>(U/mL) | Recovery<br>(%) | RSD<br>(n=3, %) |
|---------------|----------------------|-------------------------|-----------------|-----------------|
| 1             | 0.50                 | 0.54                    | 108             | 4.7             |
| 2             | 5.0                  | 5.1                     | 102             | 3.2             |
